# Supplementary material
Source: PubMed Central journal article supplement (PMC6963243)
Supplement: baADV2019000989-suppl1.pdf [file baADV2019000989-suppl1.pdf]

**Supplementary Table 1 (online only). Correlation between *BCL6* rearrangements and other characteristics.** Except for the treatment variable, P values are always dichotomous (ie, exclude unknown/fail categories).

|                            | All patients (n=109)      |                           |       | HDMTX only (n=49)         |                           |       |
|----------------------------|---------------------------|---------------------------|-------|---------------------------|---------------------------|-------|
|                            | <i>BCL6</i> neg<br>(n=79) | <i>BCL6</i> pos<br>(n=30) | p     | <i>BCL6</i> neg<br>(n=35) | <i>BCL6</i> pos<br>(n=14) | p     |
|                            | N (%)                     | N (%)                     |       | N (%)                     | N (%)                     |       |
| Age                        |                           |                           |       |                           |                           |       |
| >60 years                  | 58 (73)                   | 19 (63)                   | 0.349 | 22 (63)                   | 6 (43)                    | 0.222 |
| ≤60 years                  | 21 (27)                   | 11 (37)                   |       | 13 (37)                   | 8 (57)                    |       |
| Sex                        |                           |                           |       |                           |                           |       |
| Male                       | 47 (60)                   | 17 (57)                   | 0.830 | 21 (60)                   | 9 (64)                    | 1.0   |
| Female                     | 32 (40)                   | 13 (43)                   |       | 14 (40)                   | 5 (36)                    |       |
| Performance status         |                           |                           |       |                           |                           |       |
| 2-4                        | 60 (76)                   | 25 (83)                   | 0.452 | 21 (60)                   | 10 (71)                   | 0.527 |
| 0-1                        | 19 (24)                   | 5 (17)                    |       | 14 (40)                   | 4 (29)                    |       |
| Lactate dehydrogenase      |                           |                           |       |                           |                           |       |
| Elevated                   | 15/56 (27)                | 7/23 (30)                 | 0.786 | 9/34 (27)                 | 4/14 (28)                 | 1.0   |
| Normal                     | 41/56 (73)                | 16/23 (70)                |       | 25/34 (73)                | 10/15 (71)                |       |
| Ocular involvement         |                           |                           |       |                           |                           |       |
| Yes                        | 4 (5)                     | 1 (3)                     | 1.0   | 4 (11)                    | 1 (7)                     | 1.0   |
| No                         | 75 (95)                   | 29 (97)                   |       | 31 (89)                   | 13 (93)                   |       |
| Deep CNS lesions           |                           |                           |       |                           |                           |       |
| Yes                        | 47/78 (60)                | 17/28 (64)                | 1.0   | 22/34 (65)                | 8/14 (57)                 | 0.746 |
| No                         | 31/78 (40)                | 11/28 (39)                |       | 12/34 (35)                | 6/14 (43)                 |       |
| Number of CNS lesions      |                           |                           |       |                           |                           |       |
| 0-1                        | 45/78 (58)                | 18/28 (64)                | 0.655 | 16/34 (47)                | 10/14 (57)                | 0.202 |
| ≥2                         | 33/78 (42)                | 10/28 (46)                |       | 18/34 (53)                | 4/14 (29)                 |       |
| Largest mass               |                           |                           |       |                           |                           |       |
| ≥4 cm                      | 46/76 (61)                | 15/28 (54)                | 0.654 | 24/34 (71)                | 8/14 (57)                 | 0.503 |
| <4 cm                      | 30/76 (39)                | 10/28 (46)                |       | 10/34 (29)                | 6/14 (43)                 |       |
| Treatment                  |                           |                           |       |                           |                           |       |
| HDMTX-based                | 35 (44)                   | 14 (47)                   | 0.948 | ∕∕                        | ∕∕                        | ∕∕    |
| Radiation alone            | 29 (37)                   | 10 (33)                   |       |                           |                           |       |
| Frail/best supportive care | 15 (19)                   | 6 (20)                    |       |                           |                           |       |
| Chemotherapy regimen       |                           |                           |       |                           |                           |       |
| MIDVAP                     | ∕∕                        | ∕∕                        | ∕∕    | 8 (23)                    | 2 (14)                    | 0.702 |
| HDMTX                      |                           |                           |       | 27 (71)                   | 12 (86)                   |       |
| Rituximab                  |                           |                           |       |                           |                           |       |
| Yes                        | ∕∕                        | ∕∕                        | ∕∕    | 7 (20)                    | 3 (21)                    | 1.0   |
| No                         |                           |                           |       | 28 (80)                   | 11 (79)                   |       |

|                                                 |                                        |                                        |              |                                       |                                      |              |
|-------------------------------------------------|----------------------------------------|----------------------------------------|--------------|---------------------------------------|--------------------------------------|--------------|
| Radiation<br>Yes<br>No                          | ///<br>///                             | ///<br>///                             | ///<br>///   | 13 (37)<br>22 (63)                    | 3 (21)<br>11 (79)                    | 0.336        |
| CD10 IHC<br>Positive<br>Negative                | 4/74 (5)<br>70/74 (95)                 | 0<br>30 (100)                          | 0.322        | 1/33 (3)<br>32/33 (97)                | 0<br>14/14 (100)                     | 1.0          |
| BCL6 IHC<br>Positive<br>Negative                | 56/73 (77)<br>17/73 (23)               | 27/29 (93)<br>2/29 (7)                 | 0.088        | 22/33 (67)<br>11/33 (33)              | 12/13 (92)<br>1/13 (8)               | 0.135        |
| MUM1 IHC<br>Positive<br>Negative                | 22/73 (30)<br>51/73 (70)               | 10/30 (33)<br>20/30 (67)               | 0.816        | 11/33 (33)<br>22/33 (67)              | 3/14 (21)<br>11/14 (79)              | 0.503        |
| FOXP1 IHC<br>Positive<br>Negative               | 58/76 (76)<br>18/76 (24)               | 24/30 (80)<br>6/30 (20)                | 0.800        | 24/34 (71)<br>10/34 (29)              | 10/14 (71)<br>4/14 (29)              | 1.0          |
| LMO2 IHC<br>Positive<br>Negative                | <b>18/73 (25)</b><br><b>55/73 (75)</b> | <b>16/28 (57)</b><br><b>12/28 (43)</b> | <b>0.004</b> | <b>6/33 (18)</b><br><b>27/33 (82)</b> | <b>8/12 (67)</b><br><b>4/12 (33)</b> | <b>0.004</b> |
| COO Hans algorithm<br>GCB<br>Non-GCB            | 17/73 (23)<br>56/73 (77)               | 9/30 (30)<br>21/30 (70)                | 0.467        | 27/33 (82)<br>6/33 (18)               | 6/14 (43)<br>8/14 (57)               | 0.140        |
| COO Choi algorithm<br>GCB<br>ABC                | 11/73 (15)<br>62/73 (85)               | 5/30 (17)<br>25/30 (83)                | 1.0          | 5/33 (15)<br>28/33 (85)               | 4/14 (29)<br>10/14 (71)              | 0.419        |
| COO Tally algorithm<br>GCB<br>ABC               | 2/74 (3)<br>72/74 (97)                 | 0<br>30/30 (100)                       | 1.0          | 0<br>33/33 (100)                      | 0<br>14/14 (100)                     | 1.0          |
| MYC IHC<br>Positive<br>Negative                 | 25/64 (39)<br>39/64 (61)               | 11/25 (44)<br>14/25 (56)               | 0.811        | 12/25 (48)<br>13/25 (52)              | 4/11 (36)<br>7/11 (64)               | 0.718        |
| BCL2 IHC (124 antibody)<br>Positive<br>Negative | <b>44/63 (70)</b><br><b>19/63 (30)</b> | <b>22/24 (92)</b><br><b>2/24 (8)</b>   | <b>0.048</b> | 20/26 (77)<br>6/26 (23)               | 10/11 (91)<br>1/11 (9)               | 0.649        |
| BCL2 IHC (E17 antibody)<br>Positive<br>Negative | 55/75 (73)<br>20/75 (27)               | 27/30 (90)<br>3/30 (10)                | 0.072        | 25/33 (76)<br>8/33 (24)               | 13/14 (93)<br>1/14 (7)               | 0.244        |
| Dual MYC + BCL2 (124)<br>Positive<br>Negative   | 18/60 (30)<br>42/60 (70)               | 11/24 (46)<br>13/24 (54)               | 0.207        | 9/24 (38)<br>15/24 (62)               | 4/11 (36)<br>7/11 (64)               | 1.0          |
| Dual MYC + BCL2 (E17)<br>Positive<br>Negative   | 21/63 (33)<br>42/53 (67)               | 10/25 (40)<br>15/25 (60)               | 0.624        | 10/25 (40)<br>15/25 (60)              | 3/11 (27)<br>8/11 (73)               | 0.708        |

|                                                                          |                                        |                                       |       |                                       |                                     |       |
|--------------------------------------------------------------------------|----------------------------------------|---------------------------------------|-------|---------------------------------------|-------------------------------------|-------|
| PD-L1/2 IHC<br>Positive<br>Negative                                      | 20/73 (27)<br>53/73 (73)               | 9/29 (31)<br>20/29 (69)               | 0.809 | 10/31 (32)<br>21/31 (68)              | 2/13 (15)<br>11/13 (85)             | 0.459 |
| HLA D-PQR IHC<br>Positive cytoplasmic<br>Positive membranous<br>Negative | 37/77 (48)<br>17/77 (22)<br>23/77 (30) | 11/29 (38)<br>5/29 (17)<br>13/29 (45) | 0.350 | 19/35 (54)<br>6/35 (17)<br>10/35 (29) | 6/13 (46)<br>2/13 (15)<br>5/13 (39) | 0.805 |
| EBER IHC<br>Positive<br>Negative                                         | 6/75 (8)<br>69/75 (92)                 | 0<br>28/28 (100)                      | 0.186 | 3/33 (9)<br>30/33 (91)                | 0<br>12/12 (100)                    | 0.553 |
| <i>CIITA</i> rearrangement FISH<br>Positive<br>Negative                  | 3/73 (4)<br>70/73 (96)                 | 0<br>28/28 (100)                      | 0.558 | 1/32 (3)<br>31/32 (97)                | 0<br>12/12 (100)                    | 1.0   |
| <i>PDL 1-2</i> rearrangement<br>Positive<br>Negative                     | 1/70 (1)<br>69/70 (99)                 | 0<br>29/29 (100)                      | 1.0   | 1/31 (3)<br>30/31 (97)                | 0<br>13/13 (100)                    | 1.0   |
| <i>MYC</i> rearrangement FISH<br>Positive<br>Negative                    | 1/76 (1)<br>1/76 (99)                  | 1/28 (4)<br>27/28 (96)                | 0.468 | 0<br>34/34 (100)                      | 1/13 (8)<br>12/13 (92)              | 0.277 |
| <i>BCL2</i> rearrangement FISH<br>Positive<br>Negative                   | 0<br>77/77 (100)                       | 1/30 (3)<br>29/30 (97)                | 0.280 | 0<br>35/35 (100)                      | 0<br>14/14 (100)                    | NA    |
| <i>BCL6</i> copy number FISH<br>Gain<br>Amp/del/normal                   | 10/79 (13)<br>69/79 (87)               | 5/30 (17)<br>25/30 (83)               | 0.551 | 4/35 (11)<br>31/35 (89)               | 2/14 (14)<br>12/14 (86)             | 1.0   |

**Supplementary Table 2 (online only). Univariate analyses in the entire cohort and HDMTX subgroup.**

Except for the treatment variable, P values are always dichotomous (ie, exclude unknown/fail categories), and use the lower category as the reference. Survival analysis was not performed when n≤5 in any subgroup (see Table 1). NA: not appropriate. Bolded results (p<0.10) were included in the multivariate analyses.

| Characteristic                                           | Entire cohort (n=115)                                     |                  |                                                           |                  | HDMTX subgroup (n=52)   |              |                         |              |
|----------------------------------------------------------|-----------------------------------------------------------|------------------|-----------------------------------------------------------|------------------|-------------------------|--------------|-------------------------|--------------|
|                                                          | PFS                                                       |                  | OS                                                        |                  | PFS                     |              | OS                      |              |
|                                                          | HR (95% CI)                                               | p                | HR (95% CI)                                               | p                | HR (95% CI)             | p            | HR (95% CI)             | p            |
| Age >60 years                                            | 1.32 (0.87-2.01)                                          | 0.180            | <b>1.78 (1.13-2.81)</b>                                   | <b>0.013</b>     | 1.55 (0.64-2.09)        | 0.633        | 1.18 (0.60-2.30)        | 0.634        |
| Male                                                     | 0.93 (0.62-1.38)                                          | 0.711            | 1.26 (0.82-1.93)                                          | 0.289            | 1.13 (0.59-2.18)        | 0.710        | <b>2.52 (1.15-5.49)</b> | <b>0.020</b> |
| Performance status >1                                    | 1.39 (0.87-2.24)                                          | 0.168            | <b>2.27 (1.35-3.84)</b>                                   | <b>0.002</b>     | 1.06 (0.56-1.98)        | 0.866        | 1.77 (0.87-3.59)        | 0.114        |
| Elevated LDH                                             | <b>1.64 (0.99-2.69)</b>                                   | <b>0.052</b>     | 1.44 (0.86-2.42)                                          | 0.162            | <b>1.77 (0.92-3.41)</b> | <b>0.080</b> | 1.39 (0.69-2.78)        | 0.355        |
| Deep brain lesions                                       | 1.10 (0.74-1.63)                                          | 0.649            | 1.12 (0.74-1.69)                                          | 0.593            | 0.91 (0.52-1.80)        | 0.910        | 1.12 (0.56-2.26)        | 0.746        |
| ≥2 brain lesions                                         | 0.77 (0.52-1.14)                                          | 0.194            | 0.90 (0.60-1.35)                                          | 0.601            | 1.27 (0.69-2.36)        | 0.440        | 1.11 (0.57-2.16)        | 0.762        |
| Largest mass ≥4 cm                                       | 1.24 (0.83-1.85)                                          | 0.286            | 1.22 (0.81-1.83)                                          | 0.351            | 1.0 (0.54-1.84)         | 0.989        | 1.29 (0.65-2.54)        | 0.463        |
| Treatment<br>HDMTX-based<br>Radiation alone<br>Frail/BSC | <b>0.09 (0.05-0.18)</b><br><b>0.16 (0.09-0.30)</b><br>Ref | <b>&lt;0.001</b> | <b>0.06 (0.03-0.12)</b><br><b>0.18 (0.10-0.32)</b><br>Ref | <b>&lt;0.001</b> | ///                     | ///          | ///                     | ///          |
| MIDVAP regimen (vs. HDMTX)                               | ///                                                       | ///              | ///                                                       | ///              | 1.06 (0.53-2.10)        | 0.875        | 1.57 (0.75-3.28)        | 0.230        |
| Rituximab                                                | ///                                                       | ///              | ///                                                       | ///              | 0.81 (0.36-1.83)        | 0.612        | 0.63 (0.24-1.64)        | 0.344        |
| Radiation                                                | ///                                                       | ///              | ///                                                       | ///              | 1.43 (1.75-2.71)        | 0.275        | 1.20 (0.61-2.37)        | 0.598        |
| MUM1 IHC positive                                        | 1.05 (0.69-1.61)                                          | 0.816            | 1.22 (0.79-1.90)                                          | 0.373            | 1.06 (0.54-2.07)        | 0.872        | 1.28 (0.62-2.67)        | 0.508        |
| BCL6 IHC positive                                        | 1.46 (0.88-2.41)                                          | 0.143            | 1.44 (0.85-2.45)                                          | 0.173            | 1.33 (0.66-2.67)        | 0.413        | 1.27 (0.59-2.71)        | 0.543        |
| FOXP1 IHC positive                                       | 1.31 (0.82-2.11)                                          | 0.260            | 1.48 (0.91-2.41)                                          | 0.116            | 1.35 (0.68-2.71)        | 0.391        | 1.58 (0.76-3.28)        | 0.223        |

|                               |                         |              |                  |       |                         |              |                         |              |
|-------------------------------|-------------------------|--------------|------------------|-------|-------------------------|--------------|-------------------------|--------------|
| LMO2 IHC positive             | 1.19 (0.78-1.82)        | 0.427        | 1.25 (0.80-1.94) | 0.325 | 1.44 (0.73-2.83)        | 0.298        | <b>1.91 (0.93-3.95)</b> | <b>0.080</b> |
| Non-GCB COO (Hans)            | 0.97 (0.61-1.53)        | 0.891        | 0.83 (0.52-1.34) | 0.831 | 1.49 (0.74-3.01)        | 0.263        | 1.01 (0.47-2.16)        | 0.976        |
| Non-GCB COO (Choi)            | 0.72 (0.40-1.30)        | 0.275        | 0.62 (0.34-1.14) | 0.123 | 0.98 (0.43-2.24)        | 0.964        | 0.71 (0.29-1.72)        | 0.441        |
| MYC IHC positive              | 0.91 (0.59-1.41)        | 0.674        | 0.94 (0.59-1.46) | 0.771 | 1.06 (0.52-2.20)        | 0.863        | 1.14 (0.53-2.45)        | 0.736        |
| BCL2 IHC positive (124 stain) | 1.32 (0.79-2.20)        | 0.298        | 1.03 (0.62-1.72) | 0.916 | 1.84 (0.70-4.80)        | 0.215        | 1.21 (0.46-3.22)        | 0.698        |
| BCL2 IHC positive (E17 stain) | 1.39 (0.85-2.28)        | 0.188        | 1.03 (0.63-1.67) | 0.913 | 1.93 (0.85-4.35)        | 0.114        | 1.07 (0.47-2.46)        | 0.867        |
| Dual MYC + BCL2 (124 stain)   | 1.0 (0.63-1.59)         | 0.997        | 0.98 (0.61-1.58) | 0.947 | 1.24 (0.58-2.62)        | 0.578        | 1.17 (0.53-2.59)        | 0.694        |
| Dual MYC + BCL2 (E17 stain)   | 1.02 (0.65-1.60)        | 0.925        | 1.01 (0.64-1.60) | 0.963 | 1.21 (0.57-2.54)        | 0.619        | 1.16 (0.53-2.53)        | 0.717        |
| PD-L1/2 IHC positive          | 1.41 (0.91-2.19)        | 0.125        | 1.30 (0.83-2.04) | 0.248 | 1.33 (0.66-2.70)        | 0.430        | 1.33 (0.63-2.79)        | 0.455        |
| HLA-DP IHC positive           | 1.10 (0.73-1.66)        | 0.648        | 1.02 (0.67-1.56) | 0.932 | 1.39 (0.72-2.69)        | 0.322        | 1.33 (0.64-2.77)        | 0.441        |
| EBER ISH positive             | 0.98 (0.43-2.24)        | 0.958        | 1.47 (0.64-3.39) | 0.366 | NA                      |              | NA                      |              |
| <i>BCL6</i> FISH positive     | <b>1.68 (1.08-2.60)</b> | <b>0.021</b> | 1.28 (0.81-2.01) | 0.286 | <b>2.46 (1.26-4.84)</b> | <b>0.009</b> | 1.65 (0.81-3.36)        | 0.167        |
